# Supplementary material for: Host and Symbiont Jointly Control Gut Microbiota during Complete Metamorphosis
Source: PubMed Central journal article supplement (PMC4636265; doi:10.1371/journal.ppat.1005246), 2015-11-06
Supplement: ppat.1005246.s006.pdf [file ppat.1005246.s006.pdf]

**Table S2.** Summary of accelerated failure time model for survival data shown in Figure 2 .

|                                      | Value  | Std. Error | Z     | p        |
|--------------------------------------|--------|------------|-------|----------|
| (Intercept)                          | 15.77  | 2.1327     | 7.39  | 1.42e-13 |
| Pupal weight                         | -15.28 | 6.5618     | -2.33 | 1.98e-02 |
| Treatment =<br><i>Serratia</i>       | -2.48  | 0.8354     | -2.97 | 2.96e-03 |
| Treatment =<br><i>Staphylococcus</i> | -4.36  | 0.9241     | -4.72 | 2.32e-06 |
| Sex = female                         | 1.10   | 0.0942     | 11.67 | 1.83e-31 |
| Sex = male                           | 1.55   | 0.1033     | 15.05 | 3.22e-51 |

Scale female=3, male=4.73; Gaussian distribution; Loglik(model)=-293.1; Loglik(intercept only)=-304.3; Chisq=22.4 on 3 degrees of freedom; p=5.4e-05; 4 Newton-Raphson Iterations; n =108 (9 observations deleted due to missingness); *Serratia* n=49; *Staphylococcus* n=30; *Enterococcus* n=29; survreg(formula = ful ~ Pupal.weight + strata(Sex) + Treatment, data = fuldf, dist = "gaussian").
